# Supplementary material for: The Large-Scale Synthesis of Vinyl-Functionalized Silicon Quantum Dot and Its Application in Miniemulsion Polymerization
Source: Hindawi journal article supplement (doi:10.1155/2016/2490235), 2016-01-01
Supplement: f1 [file 2490235.f1.docx]

**The Large-Scale Synthesis of Vinyl-Functionalized Silicon Quantum Dot and Its Application in Miniemulsion Polymerization**

Xuan-Dung Mai * and Quang-Bac Hoang

Department of Chemistry, Hanoi Pedagogical University No2, 32 Nguyen Van Linh, Xuan Hoa, Phuc Yen, Vinh Phuc, Viet Nam.

*Email: [mdung.hpu2@gmail.com](mailto:mdung.hpu2@gmail.com)

**Fiugre S1.** Effects of air-storing on the photoluminescence properties of dodecyl-capped Silicon quantum dots (Si QDs). Top: pictures of Si QDs in *n-*hexane under excitation by an UV lamp; Right picture: freshly prepared Si QDs; Left picture: 1 month-aged Si QDs.

While freshly prepared sample (top right) emitted red color, centered at 684 nm, the sample emitted white color (top left) after storing in air atmosphere for 1 month. The photoluminescence spectra were conducted with an excitation wavelength of 320 nm. The Si QDs were prepared and supplied by Le Thu Huong according to her published procedure (ref S1).


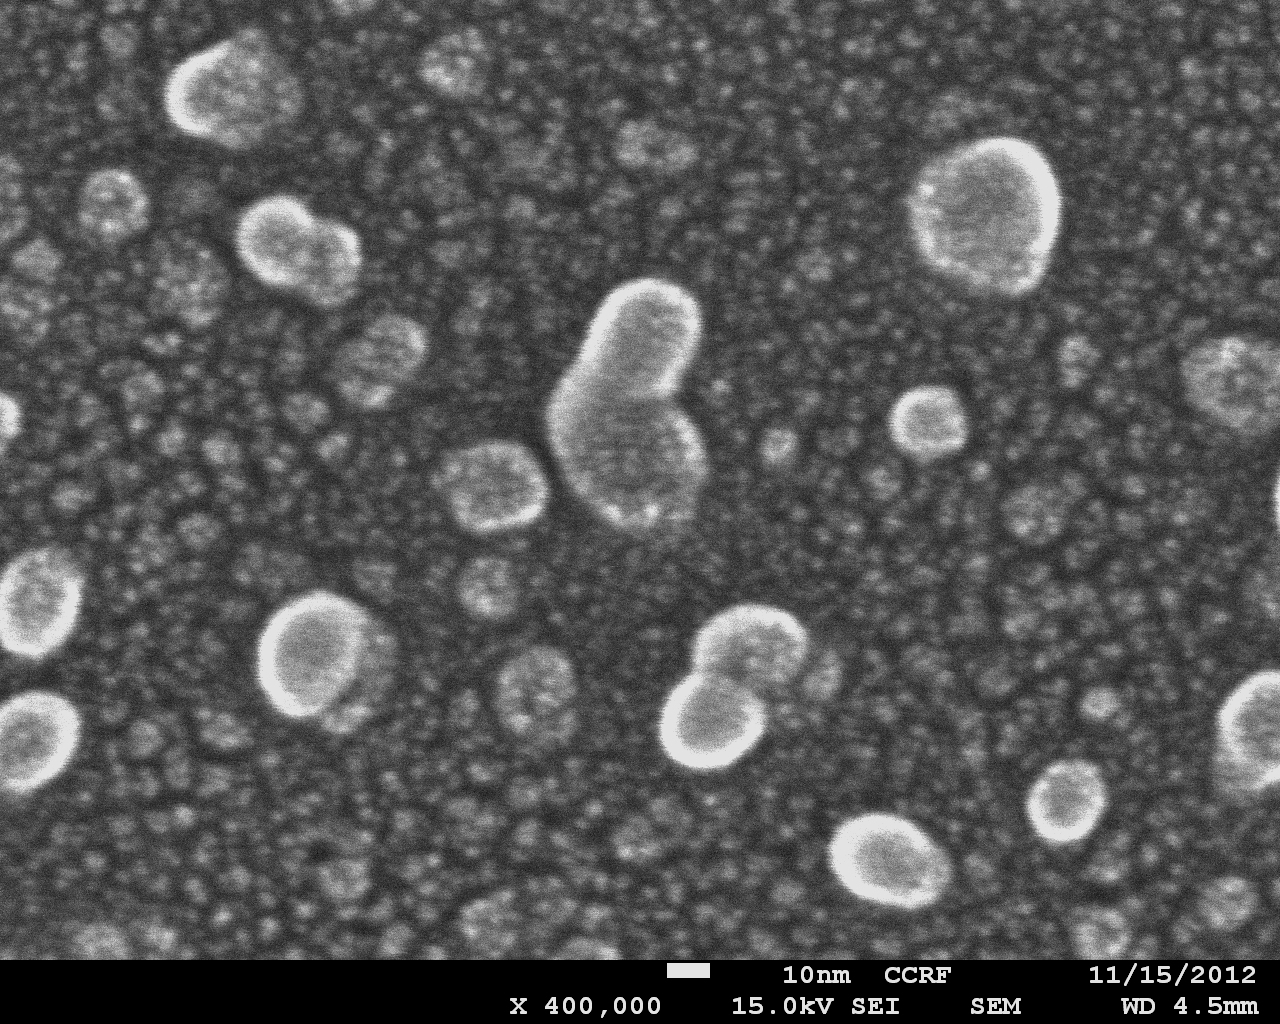


**Figure S2.** FE-SEM image of silicon quantum dots embedded polystyrene nanoparticles prepared by KOH/Oleic acid = 2 conditions.

**References.**

S1. T.H. Le, H.D. Jeong, Characterization of band gaps of silicon quantum dots synthesized by etching silicon nanopowder with aqueous hydrofluoric acid and nitric acid, Bull. Korean Chem. Soc. 35 (2014) 1523–1528.
